# Supplementary material for: Double-Edged Sword of Vitamin D3 Effects on Primary Neuronal Cultures in Hypoxic States
Source: MDPI journal article supplement (doi:10.3390/ijms22115417), 2021-05-21
Supplement: s1 [file s1]

**Table S1.** Analysis of the number of necrotic and apoptotic cells in primary neuronal cultures day after vitamin D3 application

| Group              | Number of propidium<br>iodide+ cells, %<br>(necrotic cells) | Number of<br>AnnexinV+ cells, %<br>(apoptotic cells) | Necrotic / apoptotic<br>cells ratio |
|--------------------|-------------------------------------------------------------|------------------------------------------------------|-------------------------------------|
| Sham               | 4.65±0.63                                                   | 0.58±0.21                                            | 8.04±0.62                           |
| Solvent            | 5.62±0.61                                                   | 0.81±0.52                                            | 6.93±0.53                           |
| Vitamin D3 0.01 µM | 4.08±0.72                                                   | 0.89±0.39                                            | 4.46±0.39*                          |
| Vitamin D3 0.1 µM  | 5.01±0.48                                                   | 0.46±0.12                                            | 10.90±0.84*                         |
| Vitamin D3 1 µM    | 6.2±0.87                                                    | 0.54±0.17                                            | 11.55±1.02*                         |

\* - versus "Sham", p <0.05, one-way ANOVA and Tukey post hoc test
