# Supplementary material for: Double-Edged Sword of Vitamin D3 Effects on Primary Neuronal Cultures in Hypoxic States
Source: MDPI journal article supplement (doi:10.3390/ijms22115417), 2021-05-21
Supplement: s1 [file s1]

**Table S2.** Analysis of the number of necrotic and apoptotic cells in primary neuronal cultures day after hypoxia modeling

| Group                      | Number of propidium iodide+ cells, %<br>(necrotic cells) | Number of AnnexinV+ cells, %<br>(apoptotic cells) | Necrotic / apoptotic cells ratio |
|----------------------------|----------------------------------------------------------|---------------------------------------------------|----------------------------------|
| Sham                       | 4,65±0,63                                                | 0,58±0,11                                         | 8,04±0,12                        |
| Hypoxia                    | 17,31±1,21*                                              | 1,95±0,23*                                        | 14,48±1,29*                      |
| Hypoxia+solvent            | 17,79±1,98*                                              | 1,14±0,21*                                        | 15,6±1,11*                       |
| Hypoxia+Vitamin D3 0.01 µM | 4,98±0,54#                                               | 0,67±0,12#                                        | 7,38±0,69#                       |
| Hypoxia+Vitamin D3 0.1 µM  | 5,64±0,78#                                               | 0,44±0,10#                                        | 12,9±1,02                        |
| Vitamin D3 1 µM            | 71,78±2,27*#                                             | 6,11±1,01*#                                       | 11,74±0,98                       |

\* - versus "Sham", # - versus "Hypoxia", p <0.05, one-way ANOVA and Tukey post hoc test
